# Supplementary material for: Outcomes of Patients with Non-Small Cell Lung Cancer and Brain Metastases Treated with the Upfront Single Agent Pembrolizumab: A Retrospective and Multicentric Study of the ESCKEYP GFPC Cohort
Source: MDPI journal article supplement (doi:10.3390/curroncol31030126), 2024-03-21
Supplement: s1 [file s1]

## Supplementary Material

**Table S1:** General characteristics of patients following treatment with pembrolizumab (IO) (n = 43).

| Characteristics                                                                      | Population, n (%)  |
|--------------------------------------------------------------------------------------|--------------------|
| Treatment after ICI                                                                  |                    |
| Yes                                                                                  | 22 (51.2)          |
| No                                                                                   | 21 (48.8)          |
| Radiotherapy <sup>‡</sup>                                                            |                    |
| No                                                                                   | 11 (50)            |
| Brain radiotherapy                                                                   | 4 (18.2)           |
| Extracerebral radiotherapy                                                           | 7 (31.8)           |
| Systemic treatment                                                                   |                    |
| Chemotherapy                                                                         | 16 (37.2)          |
| Targeted therapy                                                                     | 2 (4.7)            |
| Number of cycles of systemic treatment <sup>Δ</sup> , Median (range)                 | 7 (1–37)           |
| Best tumoral response <sup>†</sup>                                                   |                    |
| CR                                                                                   | 0 (0)              |
| PR                                                                                   | 7 (38.9)           |
| SD                                                                                   | 7 (38.9)           |
| PD                                                                                   | 4 (22.2)           |
| Progression free survival after start of new systemic lines, months, Median [95% CI] | 10.8 [4.23; 25.44] |

Abbreviations: CR, complete response; ICI, immune checkpoint inhibitor; PD, progressive disease; PR, partial response; SD, stable disease

Notes:

<sup>‡</sup>N = 22 patients who received treatment following ICI therapy

<sup>Δ</sup>N = 18 patients who received systemic treatment following ICI therapy

<sup>†</sup>N = 18 patients, one patient died before evaluation, and three patients had missing data about the evaluation of the new therapeutic line

**Table S2:** Univariate analysis of prognostic factors for cerebral progression-free survival (cPFS).

| Characteristics                                        | HR (95%CI)                     |
|--------------------------------------------------------|--------------------------------|
| Age                                                    | 0.967 [0.901; 1.038]           |
| Surgery (yes vs no)                                    | 1.118 [0.311; 4.015]           |
| Radiotherapy (yes vs no)                               | 2.666 [0.563; 12.620]          |
| Number of metastases                                   | 0.981 [0.770; 1.249]           |
| Ratio of cumulative size (mm)/number of BM             | 1.078 [1.022; 1.136] (p=0.006) |
| Necrosis (less or more than 50%)                       | 2.033 [0.564; 7.325]           |
| Smoking status (no smoker vs ancient or former smoker) | 1.314 [0.161; 10.740]          |
| Performance status                                     | 1.177 [0.299; 4.644]           |
| Body mass index                                        | 1.060 [0.978; 1.150]           |
| Side effect related to Pembrolizumab (yes vs no)       | 1.323 [0.340; 5.152]           |
| Tumor PD-L1 expression                                 | 1.405 [0.396; 4.980]           |

Abbreviations: BM, brain metastasis ; vs, versus

**Table S3:** Univariate analysis of prognostic factors for progression-free survival (PFS).

| Characteristics                                        | HR (95%CI)                       |
|--------------------------------------------------------|----------------------------------|
| Age                                                    | 0.997 [0.961; 1.034]             |
| Surgery (yes vs no)                                    | 0.438 [0.226; 0.850] (p = 0.015) |
| Radiotherapy (yes vs no)                               | 0.867 [0.460; 1.633]             |
| Number of metastases                                   | 1.037 [0.935; 1.149]             |
| Ratio of cumulative size (mm)/number of BM             | 1.032 [1.000; 1.066]             |
| Necrosis (less or more than 50%)                       | 1.440 [0.737; 2.813]             |
| Smoking status (no smoker vs ancient or former smoker) | 2.230 [0.846; 5.874]             |
| Performance status                                     | 1.295 [0.957; 1.752]             |
| Body mass index                                        | 1.031 [0.978; 1.088]             |
| Side effect related to Pembrolizumab (yes vs no)       | 0.531 [0.278; 1.013]             |
| Tumor PD-L1 expression                                 | 0.981 [0.519; 1.855]             |

Abbreviations: BM, brain metastasis ; vs, versus
